# Supplementary material for: EcoHIV Infection of Primary Murine Brain Cell Cultures to Model HIV Replication and Neuropathogenesis
Source: MDPI journal article supplement (doi:10.3390/v16050693), 2024-04-27
Supplement: s1 [file s1]

| Gene Name     |              | Probes (10 µM)                              | Primers (90 µM)                                                                  |
|---------------|--------------|---------------------------------------------|----------------------------------------------------------------------------------|
| MLV Env       |              | EcoP 5'-CAGACCAACAGCCACT-3'                 | EcoF 5'-GGCCAAACCCCGTTCTG-3'<br>EcoR 5'-ACTTAACAGTTTGGGCTTGGA-3'                 |
| Synaptophysin |              | Roche Universal ProbeLibrary Set, Human #72 | F 5'-AACAAAGGGCCAATGAT-3'<br>R 5'-TAGCCACATGAAAGCGAACA-3'                        |
| Vif           | EcoHIV/NL4-3 | NLVFQP<br>5'-AGTAGTAATACAAGATAATAGTGA-3'    | NLVFQ5 5'-CGCGCACGGCAAGAG-3'<br>NLVFQ3 5'-CTTTGCTTTTCTTCTTGGCACTACT-3'           |
|               | EcoHIV/NDK   | QVFP<br>5'-AGTAGTAATACAAGACAATAGTG-3'       | QVF52 5'-AAGAGGCGAGGGGCAGCGA-3'<br>QVF3 5'-TCTTTACTTTTCTTCTTGGTACTACCTTTATG-3'   |
| Tat           | EcoHIV/NL4-3 | NLTatP<br>5'-AAAGCCTTAGGCATCTC-3'           | NLTatF 5'-CCTAAACTGCTTGTACCAATTGC-3'<br>NLTatR2 5'-GTCGGGTCCCCTCGGGATTGGGAG-3'   |
|               | EcoHIV/NDK   | NDTatP<br>5'-AAAGGCTTAGGCATCTC-3'           | NDTatF 5'-CCTAGGACTGCTTGTAAATAAGTGT-3'<br>NDTatR2 5'-GTCGGGTCCCCTCGGGACTGGGAG-3' |
| Mouse GAPDH   |              | 20x mix (ABI 4352932 E)                     |                                                                                  |

Supplementary Table S1. Gene sequences of probes and primers for QPCR

|                         | 129x1/SV   |             | C57BL/6     |                |
|-------------------------|------------|-------------|-------------|----------------|
| Microglia size (μm)     | Uninfected | Infected    | Uninfected  | Infected       |
| Average                 | 35.373     | 144.571     | 28.8        | 163.357        |
| STD error               | 6.282      | 23.409      | 5.304       | 21.289         |
|                         |            |             |             |                |
| <i>t</i> -test          |            |             |             |                |
| 129x1/SV Uninfected vs. |            | 0.000000213 | 0.159374    | 0.000000000103 |
| 129x1/SV Infected vs.   |            |             | 0.000000215 | 0.299825       |
| C57BL/6 Unintected vs.  |            |             |             | 0.000000000141 |

### Supplementary Table S2. (for Figure 4)

Microglia cell size measurement of EcoHIV/NDK-EGFP-infected cell percentage to compare infectivity of EcoHIV/NDK-EGFP in difference mice strains, C57BL/6 and 129x/SV mice in brain glial cell culture.
